# Supplementary material for: Chromatin factor YY1 controls fetal hematopoietic stem cell migration and engraftment in mice
Source: JCI journal article supplement (doi:10.1172/jci188140), 2025-07-29
Supplement: sd2 [file 2]

## Supplementary data

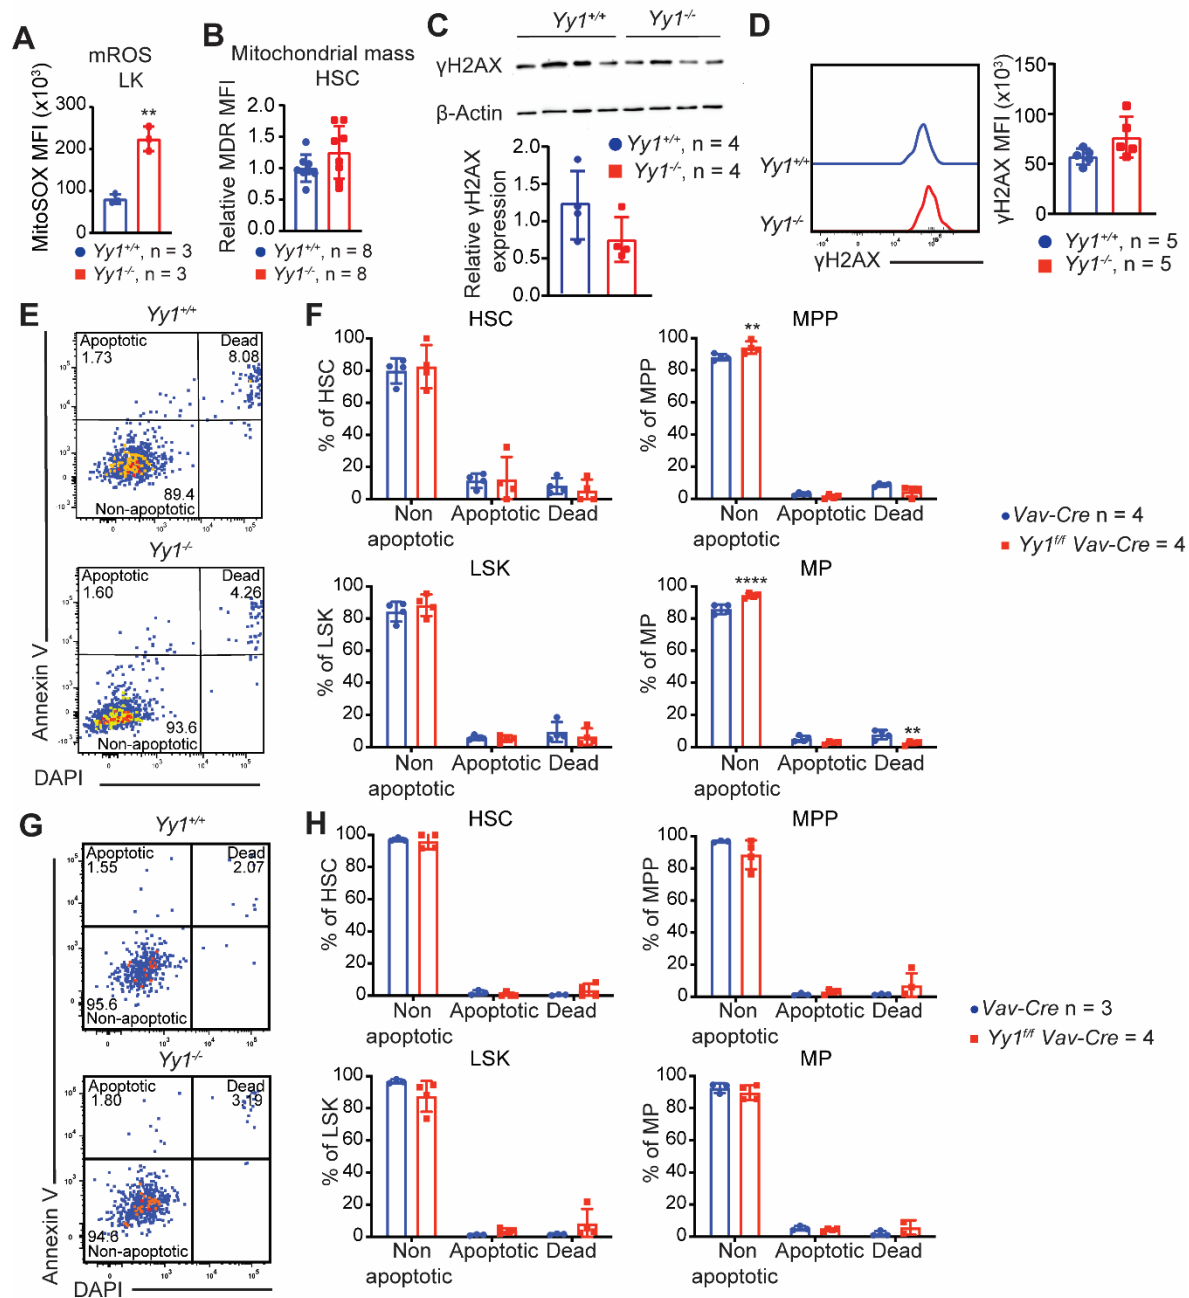

**Supplemental Figure 1.** Flow cytometry evaluation of (A) Mitochondrial ROS levels and (B) Mitochondrial mass in WT and YY1 KO HSCs. (C) WB and quantification of  $\gamma$ H2AX in Lin<sup>-</sup> FL cells. (D) Flowcytometry evaluation of  $\gamma$ H2AX expression in WT and YY1 KO HSCs. (E-H) In vivo and ex vivo survival assay of fetal HSPCs. (E) Representative flow gating strategy for non-

apoptotic (Annexin V<sup>-</sup>, DAPI<sup>-</sup>), apoptotic (Annexin V<sup>+</sup>, DAPI<sup>-</sup>) and dead cells (Annexin V<sup>+</sup>, DAPI<sup>+</sup>) in the freshly isolated FL HSPC cells. **(F)** Quantification of percentage of non-apoptotic, apoptotic, and dead cells in FL HSC, MPP, LSK, and MP cells. **(G)** Representative flow gating strategy and **(H)** quantification of non-apoptotic, apoptotic, and dead FL HSPCs cultured with serum free media overnight. N represents the number of fetuses; graphs show means  $\pm$  SD, \*\*P < 0.01, \*\*\*\*P < 0.0001 by unpaired t test (**A-D**), 2-way ANOVA (**F** and **H**).

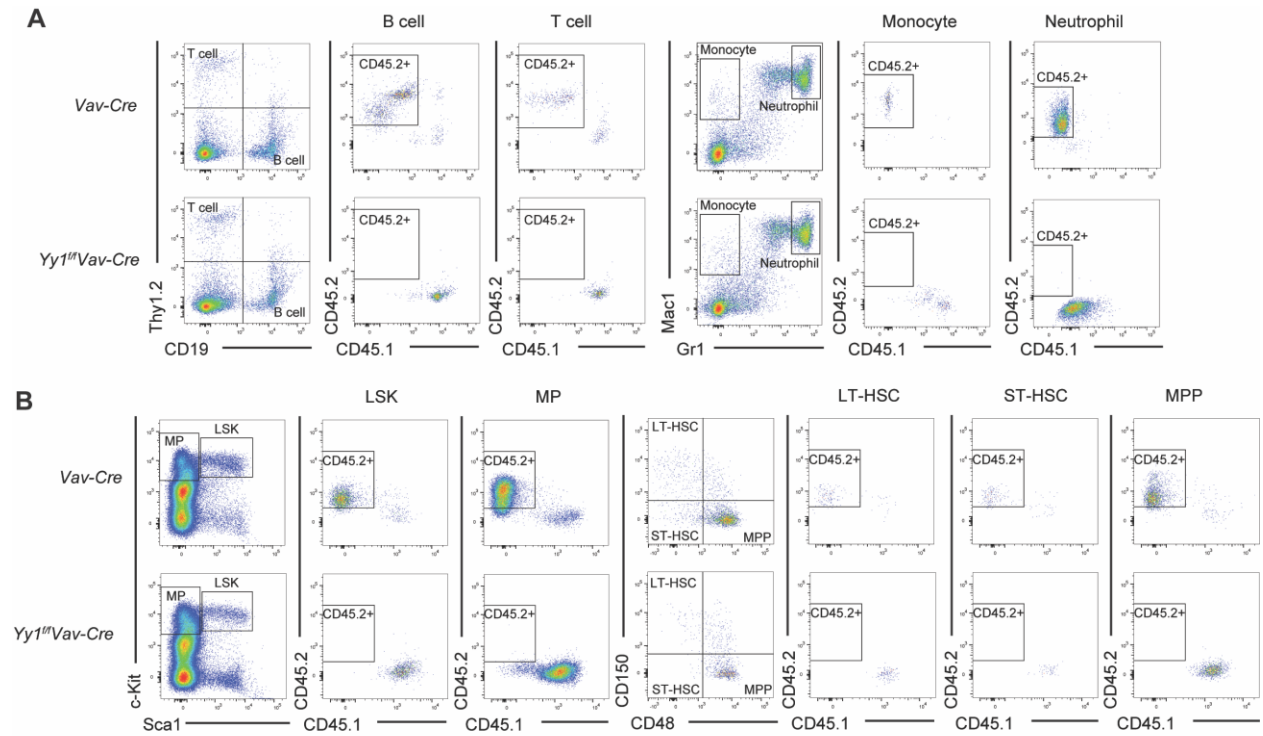

**Supplemental Figure 2. (A)** Representative flow gating strategy for donor derived BM B cells ( $CD45.2^{+}Thy1.2^{-}CD19^{+}$ ), T cells ( $CD45.2^{+}Thy1.2^{+}CD19^{-}$ ), neutrophils ( $CD45.2^{+}Mac1^{+}Gr1^{hi}$ ) and monocytes ( $CD45.2^{+}Mac1^{+}Gr1^{-}$ ) of FL transplant. **(B)** Representative flow gating strategy for donor derived BM LT-HSC ( $CD45.2^{+}Lin^{-}Sca1^{+}c-Kit^{+}CD48^{-}CD150^{+}$ ), ST-HSC ( $CD45.2^{+}Lin^{-}Sca1^{+}c-Kit^{+}CD48^{-}CD150^{-}$ ), MPP ( $CD45.2^{+}Lin^{-}Sca1^{+}c-Kit^{+}CD48^{+}CD150^{-}$ ), LSK ( $CD45.2^{+}Lin^{-}Sca1^{+}c-Kit^{+}$ ) and MP ( $CD45.2^{+}Lin^{-}Sca1^{-}c-Kit^{+}$ ) populations.

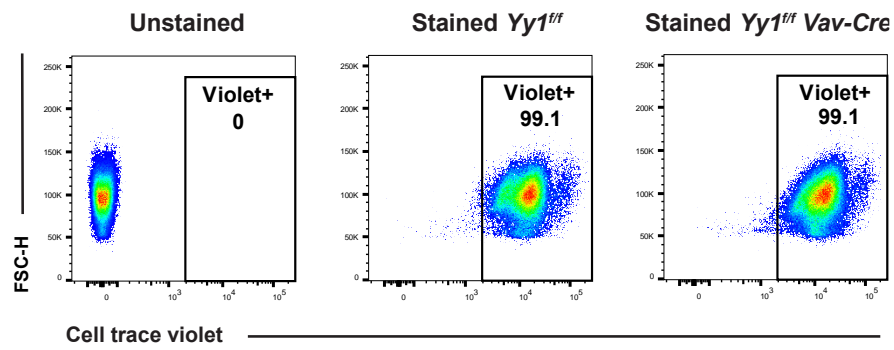

**Supplemental Figure 3.** CellTrace Violet dye labeled over 99% cells. Representative flow gating strategy for percentage of CellTrace Violet<sup>+</sup> *Yy1<sup>ff</sup>* and *Yy1<sup>ff</sup> Vav-Cre* Lin<sup>-</sup> fetal liver cells after staining.

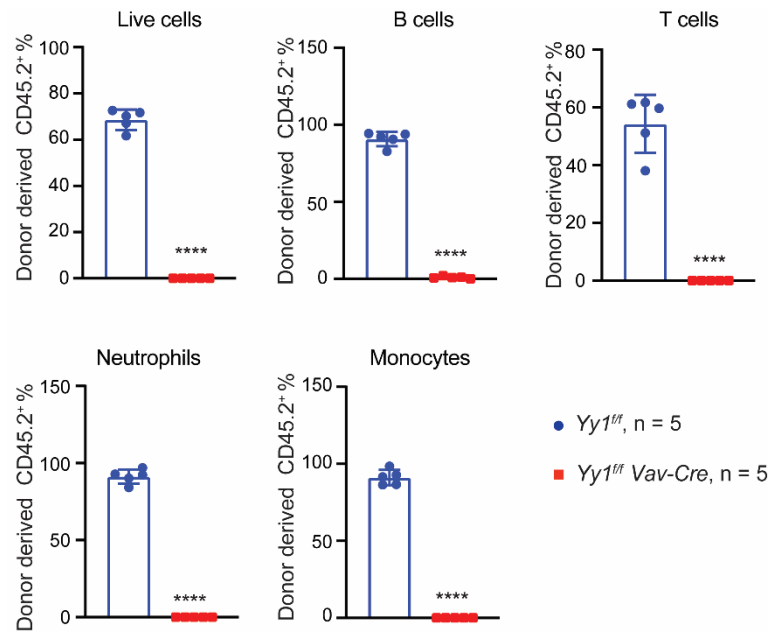

**Supplemental Figure 4.** Donor derived percentage of total live cells (CD45.2<sup>+</sup>), B cells (CD45.2<sup>+</sup>Thy1.2<sup>-</sup>CD19<sup>+</sup>), T cells (CD45.2<sup>+</sup>Thy1.2<sup>+</sup>CD19<sup>-</sup>), neutrophils (CD45.2<sup>+</sup>Mac1<sup>+</sup>Gr1<sup>hi</sup>) and monocytes (CD45.2<sup>+</sup> Mac1<sup>+</sup>Gr1<sup>-</sup>) in bone marrow of recipient mice that received intraosseous transplant of wild-type or YY1 deficient FL cells. N represents the number of mice; graphs show means  $\pm$  SD, \*\*\*\*P<0.0001 by unpaired t test.

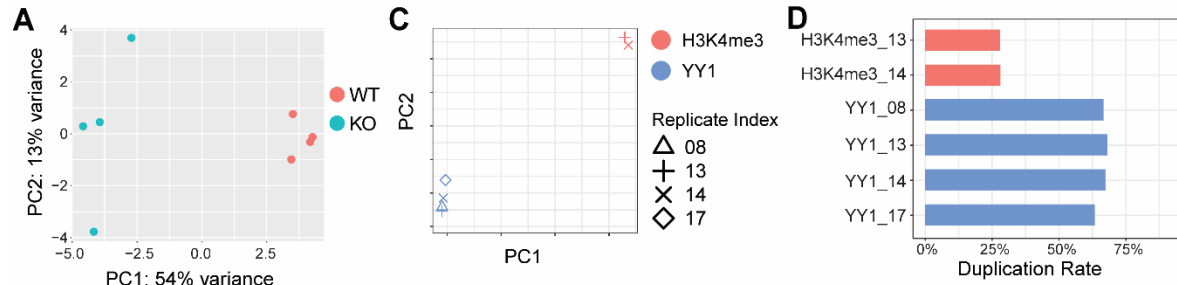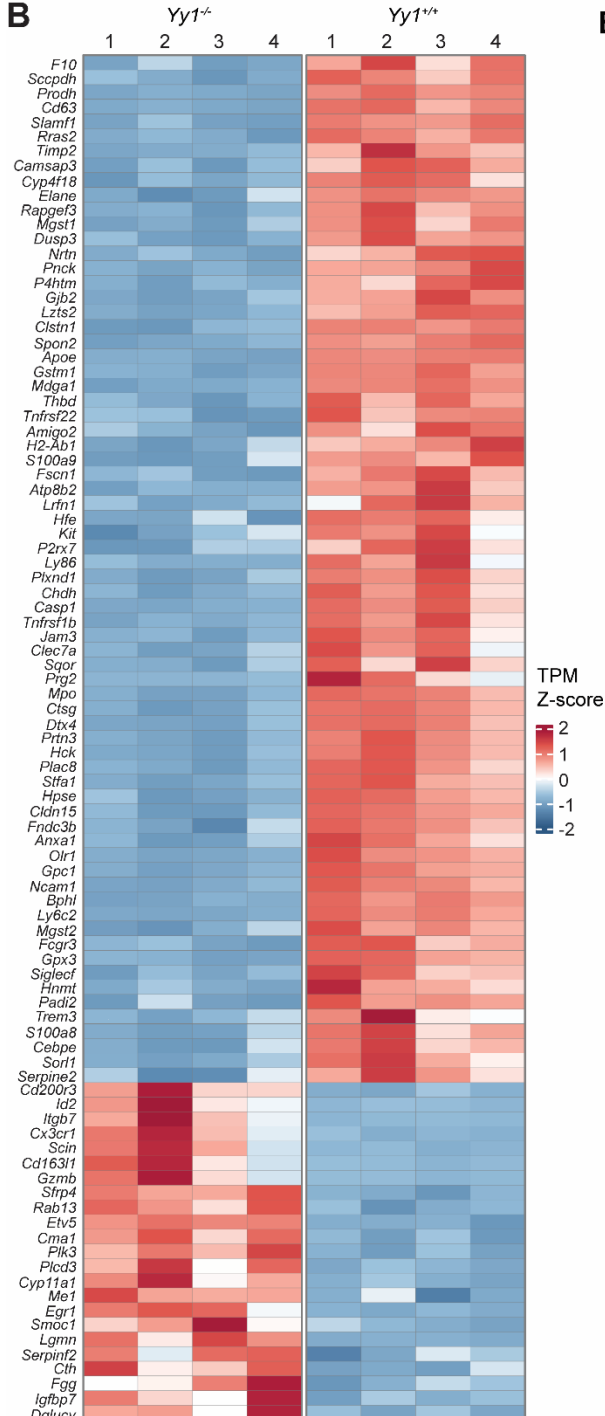

**E**

| Rank | TF    | Adjusted P | Motif Sequence          |
|------|-------|------------|-------------------------|
| 1    | KLF3  | 0          | GGGVDGGCGGGGCGYGGG      |
| 2    | E2F4  | 0          | RGGGCGGGGMMN            |
| 3    | SP3   | 0          | SGVVGCGGGCGGGCGRGS      |
| 4    | SP2   | 0          | GGSSVGGGGCGGGCCDGS      |
| 5    | KLF1  | 2.4E-303   | DGGVYKGGCYGG            |
| 6    | E2F1  | 3.8E-272   | GRGGCGGGRMV             |
| 7    | KLF5  | 2.1E-269   | RGGSWGGHGGGG            |
| 8    | SP4   | 1.5E-259   | SRGVARGGGGGRGCHDR       |
| 9    | KLF4  | 3.7E-228   | KRRVWGGGTGKGC           |
| 10   | KLF6  | 2.9E-219   | GSRRGGHGGGGMGGGRV       |
| 11   | FOX11 | 2.7E-188   | YTBGTATTGGY             |
| 12   | SP1   | 1.1E-184   | GVVGGGGVGGGGGMMGGGCGSGG |
| 13   | NRF1  | 3.1E-174   | CWSTGCGCATGCGVRS        |
| 14   | EGF1  | 1.4E-158   | GKCGKGGGGGGG            |
| 15   | NFYB  | 3.1E-154   | YRRCATAGMR              |
| 16   | KLF15 | 9.4E-147   | RGCGMGRGVGGGGGRG        |
| 17   | ZBT17 | 1.7E-140   | GSGGGGGGGAGGGMG         |
| 18   | NFYC  | 4.3E-140   | BYARCCATCAGAR           |
| 19   | EGF2  | 6.8E-119   | KHGTGGHGGGG             |
| 20   | E2F2  | 1.5E-109   | GGCGCGAAG               |
| 21   | ZFX   | 3.5E-109   | GSCBVGGCGTSSSSCS        |
| 22   | E2F3  | 1.3E-98    | GGCGGGGARS              |
| 23   | CTCF  | 4.4E-97    | GCCRSCAGGGGCGCYVB       |
| 24   | NFYA  | 1.4E-96    | BYRCCATCAGAR            |
| 25   | WT1   | 1.3E-94    | RGVGGGGAGGGGGVGGRG      |
| 26   | E2F7  | 4.4E-93    | GDGGCGGAARDR            |
| 27   | SP5   | 1.6E-86    | RRGGRRGGRRGGGGGAGGRG    |
| 28   | MBD2  | 4.0E-77    | SSGCGGGMR               |
| 29   | FLI1  | 9.8E-74    | GGVCCGGAAGYGS           |
| 30   | E2F6  | 3.8E-71    | NKGGCGGARRG             |
| 31   | MECP2 | 6.0E-71    | SCCGGR                  |
| 32   | GABPA | 1.2E-69    | GGVRCGGAAGTV            |
| 33   | ELF1  | 1.4E-69    | SRACCGGAAGTGS           |
| 34   | CTCF  | 2.5E-62    | YGGCCASCAGRGGGCGCYVB    |
| 35   | SALL4 | 2.2E-60    | GSDGGGWWGG              |
| 36   | YY1   | 2.1E-59    | CAAVATGGCGG             |
| 37   | ZN281 | 1.9E-54    | GGGGTGGGGAGGGG          |
| 38   | AP2B  | 1.3E-49    | GCCYGVGGGS              |
| 39   | PBX3  | 1.7E-48    | YBYTGATTGRYTGR          |
| 40   | ELK1  | 1.4E-47    | RCCGGAAGTV              |
| 41   | ARNT  | 3.6E-46    | BYRCGTGC                |
| 42   | AHR   | 6.0E-46    | DTYCGTGM                |
| 43   | ELK4  | 3.0E-43    | SRRCGGAAGYRG            |
| 44   | FEV   | 2.8E-41    | GCVGGAGY                |
| 45   | TFEB  | 2.9E-38    | RGTACGTG                |
| 46   | MAZ   | 5.0E-37    | GGGGGAGGGGGDRRRRRRG     |
| 47   | ATF1  | 3.3E-36    | VTGACGTAS               |
| 48   | ZFP57 | 2.2E-34    | CTGCGGCARR              |
| 49   | AP2C  | 3.0E-34    | YRSCCYAGGSYN            |
| 50   | MYC   | 3.3E-34    | MGCCACGTGSBC            |
| 51   | ETS1  | 5.0E-34    | VRRRCMGAAGTGG           |
| 52   | KAISO | 4.5E-32    | SARRYCTCGGAGAV          |
| 53   | TAF1  | 4.5E-31    | VAAAWGGCGMG             |
| 54   | MAX   | 2.4E-30    | SVSCAGTGGC              |
| 55   | AP2A  | 6.1E-30    | VTRSCGTGRGC             |
| 56   | PKNX1 | 8.6E-30    | TGABTGRGAS              |
| 57   | USF2  | 9.3E-27    | GGGTACGTGRBSVSSSB       |
| 58   | RFX1  | 5.2E-26    | SSSCBTTGCCAKGVRACSS     |
| 59   | PBX1  | 7.3E-26    | TGAKTGACAGS             |
| 60   | KLF8  | 1.7E-24    | CAGGGKGTG               |
| 61   | ZIC1  | 7.0E-23    | KGGWGGTS                |
| 62   | ERG   | 5.9E-22    | VVRCMGGAAGYRVV          |
| 63   | SRBP2 | 6.3E-20    | VSGTGGGGWABG            |
| 64   | SRBP1 | 1.9E-18    | GGTGGGGTGAB             |
| 65   | USF1  | 3.7E-16    | SRGTACGTGRCS            |
| 66   | MYCN  | 4.5E-13    | SCACGTGG                |
| 67   | E2F5  | 1.5E-12    | SGCGCSAAH               |
| 68   | MXI1  | 1.8E-12    | VCACGTGGSNGSBS          |
| 69   | MTF1  | 2.2E-12    | MKGCCGTGTGCAARS         |
| 70   | HINFP | 4.0E-12    | DMSHHMCGGACGTTV         |
| 71   | HEN1  | 8.8E-12    | BGGKMKACGTGCKCCYY       |
| 72   | INSM1 | 8.0E-11    | TGTMAAGGGGCR            |
| 73   | PAX5  | 6.8E-10    | VDRVKAGYSRAGCGTGAC      |
| 74   | ZFP42 | 1.2E-09    | GGCMGCCATTTT            |
| 75   | ELF2  | 3.4E-09    | TDCAGGAAGTRRV           |
| 76   | OVOL2 | 9.4E-09    | RTAACGGD                |
| 77   | EPAS1 | 1.8E-07    | VTACGTGMC               |
| 78   | NR1H4 | 3.8E-07    | RRGGCAVTGRCCBSGVGG      |
| 79   | HIF1A | 4.2E-07    | GDACGTGM                |
| 80   | ZBT7A | 3.4E-06    | VRGGGKCKY               |
| 81   | ZIC3  | 7.3E-06    | GGCYHCCTGTGWGH          |
| 82   | ZN143 | 1.2E-05    | KGCMTKGTGGGARWGTAGTYY   |
| 83   | GATA1 | 6.2E-05    | TGSNSSNDSAGATAAGRV      |
| 84   | TFE3  | 1.1E-04    | RGTACGTGA               |
| 85   | ZN322 | 9.1E-04    | GAGCCTGSTACWSGCCGTR     |
| 86   | ZIC2  | 1.1E-03    | DGCVHCCTGTGWGH          |
| 87   | COE1  | 3.4E-03    | RGYCCWGGGGAS            |
| 88   | RFX3  | 3.6E-03    | CSGTTGCCATGGMRC         |
| 89   | MITF  | 5.3E-03    | YCWYGTGACY              |
| 90   | TAL1  | 6.4E-03    | CTGSNNNNRSAGATAAGRV     |
| 91   | PRDM5 | 1.1E-02    | VMTGGAGDCMRGGW          |
| 92   | EHF   | 1.2E-02    | VWACSGAGGAGTDS          |
| 93   | ETV2  | 1.2E-02    | RRARRCAGGAARYGS         |
| 94   | MYBA  | 1.8E-02    | VGYGGCVGTTTSVGV         |

**Supplemental Figure 5.** (A) PCA plot of RNA-seq from sorted *Yy1*<sup>+/+</sup> and *Yy1*<sup>-/-</sup> Lin<sup>-</sup> cKit<sup>+</sup> E14.5 FL cells. (B) Heatmap depicting selected upregulated and down-regulated genes based on TPM. (C) PCA plot of CUT&Tag. (D) Duplication rate of each CUT&Tag sample. (E) Motif analysis identified 94 significantly enriched (adjusted P < 0.05) transcription factor motifs, ranked based on adjusted P. TF motifs known to play essential roles in hematopoiesis, chromatin structure regulation, cell stress response, and cellular proliferation are highlighted.

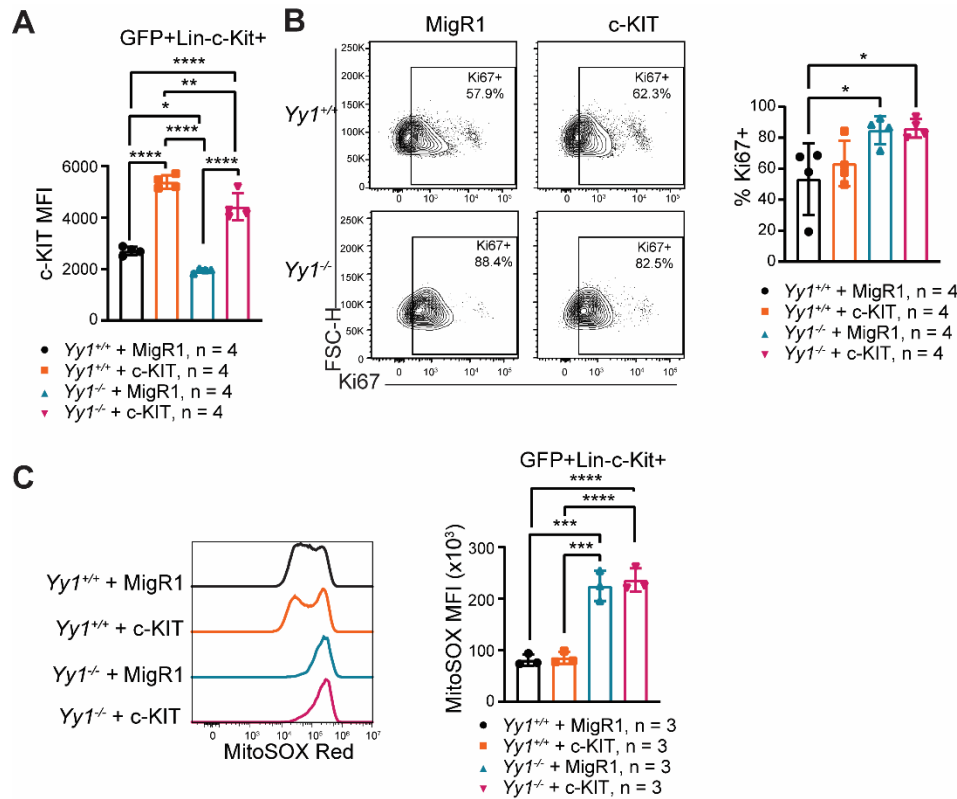

**Supplemental Figure 6. Ectopic expression of c-Kit did not rescue YY1-dependent cell cycle or mitochondrial ROS in FL LK cells. (A)** Ectopic expression of c-Kit rescued c-Kit MFI in YY1 deficient FL LK cells. **(B)** Representative gating strategy for Ki67 proliferation assay. E14.5 Lin<sup>-</sup> FL cells were infected with either MigR1 (control) or MigR1-c-Kit vectors. The percentages of Ki67<sup>+</sup> and Ki67<sup>-</sup> cells were quantified within GFP<sup>+</sup>Lin<sup>-</sup>c-Kit<sup>+</sup> populations. **(C)** Representative flow cytometry plots and quantification of mitochondrial ROS levels in GFP<sup>+</sup>Lin<sup>-</sup>c-Kit<sup>+</sup> cells infected with either MigR1-c-Kit or MigR1 vector control. N represents the number of fetuses; graphs show means  $\pm$  SD, \*P < 0.05, \*\*P < 0.01, \*\*\*P < 0.001, \*\*\*\*P < 0.0001 by one way ANOVA.



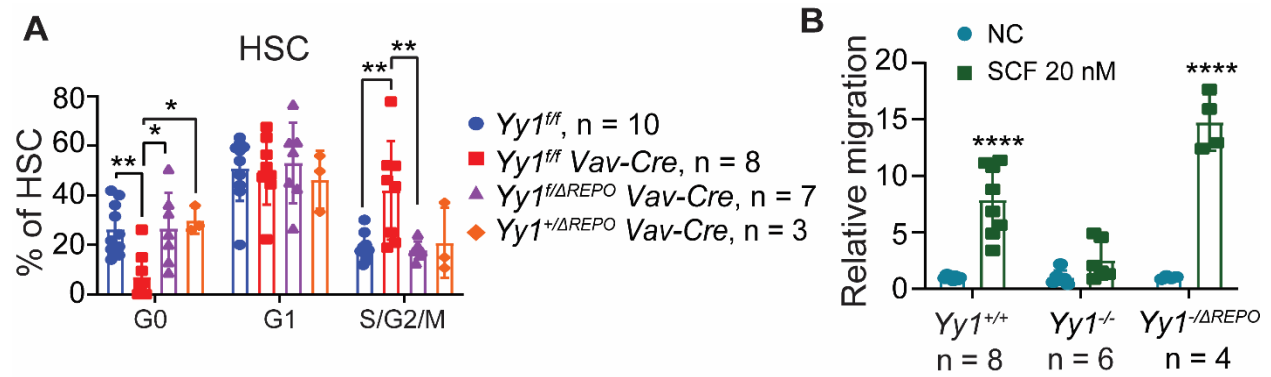

**Supplemental Figure 7. The YY1 REPO domain deletion did not impact HSC proliferation and SCF-dependent cell migration.** (A) Quantification of percentage of fetal HSC in G0 (Ki67<sup>-</sup>DAPI<sup>-</sup>), G1 (Ki67<sup>+</sup>DAPI<sup>-</sup>) and S/G2/M (Ki67<sup>+</sup>DAPI<sup>+</sup>) phases. (B) Ex vivo migration assay of *Yy1<sup>-/-</sup>ΔREPO*, *Yy1<sup>-/-</sup>* and *Yy1<sup>+/+</sup>* Lin<sup>-</sup> FL cells in response to SCF stimulation. While YY1-deficient cells exhibit significantly impaired migration upon SCF stimulation, both wild type and *Yy1<sup>-/-</sup>ΔREPO* cells are responsive to SCF stimulation. N represents the number of fetuses; graphs show means ± SD, \*P < 0.05, \*\*P < 0.01, \*\*\*\*P < 0.0001 by 2-way ANOVA.

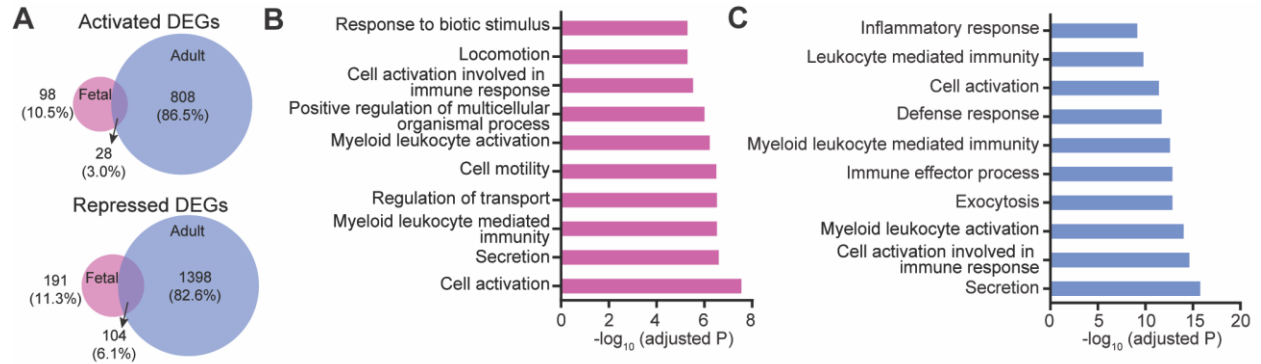

**Supplemental Figure 8.** (A) Venn diagram of activated and repressed DEGs associated with YY1 deletion in fetal versus adult HSPCs. (B-C) GSEA analysis of enriched GO pathways in fetal (B) and adult HSPCs (C).

**Table 1****qRT-PCR Primer list**

|               | Forward                  | Reverse                    |
|---------------|--------------------------|----------------------------|
| <i>Yy1</i>    | TCAGACCCTAAGCAACTGGCAGAA | TTGAGCTCTCAACGAACGCTTTGC   |
| <i>Kit</i>    | AGTGGACGTACAGGTCCAGAA    | GCCTGGATTTGCTCTTTGTTGT     |
| <i>S100a8</i> | ATCACCATGCCCTCTACAAGAATG | GTCCAATTCTCTGAACAAGTTTTC   |
| <i>S100a9</i> | AAGCTGCATGAGAACAACCCA    | CCCAGAACAAAGGCCATTGA       |
| <i>Gpc1</i>   | GAATTTGGCCAACCACAGCC     | GTAGTAGAGGCGCAGCTCAG       |
| <i>Hck</i>    | GCCAACCTGATGAAGTCGCT     | TGTACTCATTGTCCTCGATGATTCTG |
| <i>Csf1r</i>  | CAGTTCAGAGTGATGTGTGGTC   | CTTGTTGTTCACTAGGATGCCG     |
| <i>Padi2</i>  | CAGCCGCCTATACGGGAAA      | CTTCACACCTTCCGAGTGCT       |
| <i>Jam3</i>   | TACCGCAATGATGTGCCACT     | GATGAAGCAGCCTCGTCTGT       |
| <i>Cd63</i>   | CTGTGGGCTGTGGGAATGAT     | CCTCCACAAAAGCAATGCCC       |
| <i>Cxcr2</i>  | CATCCCGTTTGAGGGTCGTA     | GCAGGAAGACAAGGACGACA       |
| <i>Mpo</i>    | CCTCCAACCGTGCCTTTGTA     | GTCAGCTGATCGTTGGGGAA       |
| <i>Olr1</i>   | CTGCGAATGACGAGCCTGA      | CCAGAGTCATAGCAGCAGGG       |
| <i>Pnck</i>   | ATCGCGGTACTTCGCAGAAT     | CCAAGGACCTGCCCTACAAG       |
| <i>Cxcr4</i>  | GACTGGCATAGTCGGCAATG     | AGAAGGGGAGTGTGATGACAAA     |
| <i>Gapdh</i>  | TCCTGCACCACCAACTGCTT     | GTCTTCTGGGTGGCAGTGAT       |

**Table 2****Genotyping Primer list**

|                            | Forward                   | Reverse                  |
|----------------------------|---------------------------|--------------------------|
| <i>Yy1</i> P1, P2          | ACCTGGTCTATCGAAAGGAAGCAC  | GCTTCGCCTATTCTCGCTCATAA  |
| <i>Yy1</i> P3, P4          | TAGAGAATAGGAACTTCGGCCGCCA | CCAAAGTTCGAAACCTGCTTTCCT |
| <i>Yy1<sup>AREPO</sup></i> | GACGGCTTCGAGGACCAGAT      | GCGCCCATCACACACATAAAA    |
